# Supplementary material for: Integrated microarray and multiplex cytokine analyses of Kaposi's Sarcoma Associated Herpesvirus viral FLICE Inhibitory Protein K13 affected genes and cytokines in human blood vascular endothelial cells
Source: PubMed Central journal article supplement (PMC2732924; doi:10.1186/1755-8794-2-50), 2009-08-06
Supplement: 1755-8794-2-50-S1.pdf [file 1755-8794-2-50-S1.pdf]

**Supplementary Table1. Primers used in the real time PCR.**

|                 |                             |
|-----------------|-----------------------------|
| VCAM1 Forward   | GGGACCACATCTACGCTGACA       |
| VCAM1 Reverse   | CCTGTCTGCATCCTCCAGAAA       |
| CSF2 Forward    | GGCCAGCCACTACAAGCAGCACT     |
| CSF2 Reverse    | CAAAGGGGATGACAAGCAGAAAAG    |
| SOD2 Forward    | CGACCTGCCCTACGACTACG        |
| SOD2 Reverse    | TGACCACCACCATTGAACTT        |
| CXCL3 Forward   | AAGAAGCTTATCAGCGTATCAT      |
| CXCL3 Reverse   | AATAAGTAGAACCCCTCGTAAGAAA   |
| IGFBP5 Forward  | GAGCTGAAGGCTGAAGCAGT        |
| IGFBP5 Reverse  | GAATCCTTTGCGGTCACAAT        |
| BIRC3 Forward   | ACTTGAACAGCTGCTATCCACATC    |
| BIRC3 Reverse   | GTTGCTAGGATTTTTCTCTGAACTGTC |
| COX2 Forward    | TGAGCATCTACGGTTTGCTG        |
| COX2 Reverse    | AACTGCTCATCACCCATTTC        |
| IL8 Forward     | GCCAACACAGAAAATTATTGTAAGCTT |
| IL8 Reverse     | CCTCTGCACCCAGTTTTCTT        |
| CCL5 Forward    | CCCAGCAGTCGTCTTTGTCA        |
| CCL5 Reverse    | TCCCGAACCATTCTTCTCT         |
| CXCL10 Forward  | GAGCCTACAGCAGAGGAACC        |
| CXCL10 Reverse  | GAGTCAGAAAGATAAGGCAGC       |
| IL6 Forward     | GGTACATCCTCGACGGCATCT       |
| IL6 Reverse     | GTGCCTCTTTGCTGCTTTTAC       |
| K13 Forward     | GGATGCCCTAATGTCAATGC        |
| K13 Reverse     | GGCGATAGTGTTGGAGTGT         |
| ORF50 Forward   | CACAAAAATGGCGCAAGATGA       |
| ORF50 Reverse   | TGGTAGAGTTGGGCCTTCAGTT      |
| ORFK8.1 Forward | AAAGCGTCCAGGCCACCACAGA      |
| ORFK8.1 Reverse | GGCAGAAAATGGCACACGGTTAC     |
| VEGFR-3 Forward | CTGCTGGAGGAAAAGTCTGG        |
| VEGFR-3 reverse | GTCTTGATGTCTGCGTGGG         |
| PROX-1 Forward  | TTGACATTGGAGTGAAAAGGACG     |
| PROX-1 reverse  | TGCTCAGAACCCTTGGGGATTTC     |
| LYVE-1 Forward  | TCACTTCCATCTGGACTACGAG      |
| LYVE-1 Reverse  | CACAAGGGTGATCCCCATAATTC     |
