# Supplementary material for: Integrated microarray and multiplex cytokine analyses of Kaposi's Sarcoma Associated Herpesvirus viral FLICE Inhibitory Protein K13 affected genes and cytokines in human blood vascular endothelial cells
Source: PubMed Central journal article supplement (PMC2732924; doi:10.1186/1755-8794-2-50), 2009-08-06
Supplement: 1755-8794-2-50-S2.pdf [file 1755-8794-2-50-S2.pdf]

**Supplementary Table 2: Summary of differentially regulated gene in 4-OHT treated K13 ER-transduced HUVEC.**

| S.No.                     | Gene Name                                                                                                            | Gene            | Entrez Gene | Fold Change |
|---------------------------|----------------------------------------------------------------------------------------------------------------------|-----------------|-------------|-------------|
| <b>Up-regulated genes</b> |                                                                                                                      |                 |             |             |
| 1                         | <i>chemokine (C-C motif) ligand 2</i>                                                                                | <b>CCL2</b>     | 6347        | 71.4        |
| 2                         | <i>ubiquitin D</i>                                                                                                   | <b>UBD</b>      | 10537       | 58.4        |
| 3                         | <i>chemokine (C-C motif) ligand 20</i>                                                                               | <b>CCL20</b>    | 6364        | 53.1        |
| 4                         | <i>chemokine (C-C motif) ligand 5</i>                                                                                | <b>CCL5</b>     | 6352        | 48.3        |
| 5                         | <i>chemokine (C-X-C motif) ligand 10</i>                                                                             | <b>CXCL10</b>   | 3627        | 47.7        |
| 6                         | <i>vascular cell adhesion molecule 1</i>                                                                             | <b>VCAM1</b>    | 7412        | 46.0        |
| 7                         | <i>selectin E (endothelial adhesion molecule 1)</i>                                                                  | <b>SELE</b>     | 6401        | 35.4        |
| 8                         | <i>superoxide dismutase 2, mitochondrial</i>                                                                         | <b>SOD2</b>     | 6648        | 35.2        |
| 9                         | <i>chemokine (C-X-C motif) ligand 3</i>                                                                              | <b>CXCL3</b>    | 2921        | 33.8        |
| 10                        | <i>chemokine (C-X-C motif) ligand 2</i>                                                                              | <b>CXCL2</b>    | 2920        | 32.2        |
| 11                        | <i>interleukin 8</i>                                                                                                 | <b>IL8</b>      | 3576        | 31.5        |
| 12                        | <i>chromosome 15 open reading frame 48</i>                                                                           | <b>C15orf48</b> | 84419       | 29.6        |
| 13                        | <i>solute carrier family 7 (cationic amino acid transporter)</i>                                                     | <b>SLC7A2</b>   | 6542        | 23.2        |
| 14                        | <i>chemokine (C-X3-C motif) ligand 1</i>                                                                             | <b>CX3CL1</b>   | 6376        | 22.3        |
| 15                        | <i>intercellular adhesion molecule 1 (CD54)</i>                                                                      | <b>ICAM1</b>    | 3383        | 22.2        |
| 16                        | <i>tumor necrosis factor, alpha-induced protein 6</i>                                                                | <b>TNFAIP6</b>  | 7130        | 21.2        |
| 17                        | <i>interleukin 6 (interferon, beta 2)</i>                                                                            | <b>IL6</b>      | 3569        | 21.1        |
| 18                        | <i>colony stimulating factor 2 (granulocyte-macrophage)</i>                                                          | <b>CSF2</b>     | 1437        | 15.1        |
| 19                        | <i>interferon stimulated exonuclease gene 20kDa</i>                                                                  | <b>ISG20</b>    | 3669        | 13.6        |
| 20                        | <i>chemokine (C-X-C motif) ligand 5</i>                                                                              | <b>CXCL5</b>    | 6374        | 13.0        |
| 21                        | <i>laminin, gamma 2</i>                                                                                              | <b>LAMC2</b>    | 3918        | 12.7        |
| 22                        | <i>tumor necrosis factor, alpha-induced protein 3</i>                                                                | <b>TNFAIP3</b>  | 7128        | 12.5        |
| 23                        | <i>matrix metalloproteinase 10 (stromelysin 2)</i>                                                                   | <b>MMP10</b>    | 4319        | 11.5        |
| 24                        | <i>tumor necrosis factor, alpha-induced protein 2</i>                                                                | <b>TNFAIP2</b>  | 7127        | 11.3        |
| 25                        | <i>Epstein-Barr virus induced gene 3</i>                                                                             | <b>EBI3</b>     | 10148       | 9.8         |
| 26                        | <i>tumor necrosis factor (ligand) superfamily, member 13b</i>                                                        | <b>TNFSF13B</b> | 10673       | 9.6         |
| 27                        | <i>phospholipase A1 member A</i>                                                                                     | <b>PLA1A</b>    | 51365       | 9.4         |
| 28                        | <i>GTP cyclohydrolase 1 (dopa-responsive dystonia)</i>                                                               | <b>GCH1</b>     | 2643        | 9.0         |
| 29                        | <i>nuclear factor of kappa light polypeptide gene enhancer, alpha</i>                                                | <b>NFKBIA</b>   | 4792        | 8.3         |
| 30                        | <i>proteasome (prosome, macropain) subunit, beta type, 9</i>                                                         | <b>PSMB9</b>    | 5698        | 7.9         |
| 31                        | <i>Chemokine (C-X-C motif) 1</i>                                                                                     | <b>CXCL1</b>    | 2919        | 7.7         |
| 32                        | <i>histone cluster 2, H2aa3</i>                                                                                      | <b>HIST2</b>    | 723790      | 7.5         |
| 33                        | <i>HLA-G histocompatibility antigen, class I, G</i>                                                                  | <b>HLA-G</b>    | 3135        | 7.2         |
| 34                        | <i>hydroxysteroid (11-beta) dehydrogenase 1</i>                                                                      | <b>HSD11B1</b>  | 3290        | 7.2         |
| 35                        | <i>chemokine (C-X-C motif) receptor 7</i>                                                                            | <b>CXCR7</b>    | 57007       | 7.0         |
| 36                        | <i>major histocompatibility complex, class I, B</i>                                                                  | <b>HLA-B</b>    | 3106        | 6.3         |
| 37                        | <i>nuclear receptor coactivator 7</i>                                                                                | <b>NCOA7</b>    | 135112      | 6.1         |
| 38                        | <i>myxovirus (influenza virus) resistance 2 (mouse)</i>                                                              | <b>MX2</b>      | 4600        | 5.8         |
| 39                        | <i>radical S-adenosyl methionine domain containing 2</i>                                                             | <b>RSAD2</b>    | 91543       | 5.6         |
| 40                        | <i>TNFAIP3 interacting protein 1</i>                                                                                 | <b>TNIP1</b>    | 10318       | 5.5         |
| 41                        | <i>tissue factor pathway inhibitor 2</i>                                                                             | <b>TFPI2</b>    | 7980        | 5.4         |
| 42                        | <i>interleukin 32</i>                                                                                                | <b>IL32</b>     | 9235        | 5.3         |
| 43                        | <i>nibrin</i>                                                                                                        | <b>NBN</b>      | 4683        | 5.2         |
| 44                        | <i>receptor (chemosensory) transporter protein 4</i>                                                                 | <b>RTP4</b>     | 64108       | 5.2         |
| 45                        | <i>baculoviral IAP repeat-containing 3</i>                                                                           | <b>BIRC3</b>    | 330         | 5.1         |
| 46                        | <i>interleukin 7 receptor /// interleukin 7 receptor</i>                                                             | <b>IL7R</b>     | 3575        | 5.0         |
| 47                        | <i>transporter 1, ATP-binding cassette, sub-family B (MDR/TAP)</i>                                                   | <b>TAP1</b>     | 6890        | 5.0         |
| 48                        | <i>papilin, proteoglycan-like sulfated glycoprotein</i>                                                              | <b>PAPLN</b>    | 89932       | 4.9         |
| 49                        | <i>Major histocompatibility complex, class I, F</i>                                                                  | <b>HLA-F</b>    | 3134        | 4.9         |
| 50                        | <i>myosin, light chain kinase</i>                                                                                    | <b>MYLK</b>     | 4638        | 4.9         |
| 51                        | <i>interferon induced transmembrane protein 1 (9-27)</i>                                                             | <b>IFITM1</b>   | 8519        | 4.8         |
| 52                        | <i>interferon-induced protein 35</i>                                                                                 | <b>IFI35</b>    | 3430        | 4.8         |
| 53                        | <i>proline-serine-threonine phosphatase interacting protein 2</i>                                                    | <b>PSTPIP2</b>  | 9050        | 4.8         |
| 54                        | <i>bone marrow stromal cell antigen 2</i>                                                                            | <b>BST2</b>     | 684         | 4.7         |
| 55                        | <i>2'-5'-oligoadenylate synthetase 3, 100kDa</i>                                                                     | <b>OAS3</b>     | 4940        | 4.7         |
| 56                        | <i>caspase 1, apoptosis-related cysteine peptidase (interleukin 1, beta, convertase)</i>                             | <b>CASP1</b>    | 834         | 4.6         |
| 57                        | <i>interferon-induced protein with tetratricopeptide repeats 3</i>                                                   | <b>IFIT3</b>    | 3437        | 4.5         |
| 58                        | <i>CNKSR family member 3</i><br><i>likely ortholog of mouse lung-inducible Neutralized-related C3HC4 RING domain</i> | <b>CNKSR3</b>   | 154043      | 4.5         |
| 59                        | <i>Duffy blood group, chemokine receptor</i>                                                                         | <b>LINCR</b>    | 93082       | 4.5         |
| 60                        | <i>butyrophilin, subfamily 3, member A1</i>                                                                          | <b>DARC</b>     | 2532        | 4.4         |
| 61                        | <i>butyrophilin, subfamily 3, member A1</i>                                                                          | <b>BTN3A1</b>   | 11119       | 4.3         |
| 62                        | <i>solute carrier family 2 (facilitated glucose transporter), member 6</i>                                           | <b>SLC2A6</b>   | 11182       | 4.3         |
| 63                        | <i>lipase, endothelial</i>                                                                                           | <b>LIPG</b>     | 9388        | 4.3         |

|                             |                                                                                  |                 |        |      |
|-----------------------------|----------------------------------------------------------------------------------|-----------------|--------|------|
| 64                          | <i>guanylate binding protein 1, interferon-inducible, 67kDa</i>                  | <b>GBP1</b>     | 2633   | 4.2  |
| 65                          | <i>prolactin receptor</i>                                                        | <b>PRLR</b>     | 5618   | 4.1  |
| 66                          | <i>cytochrome b5 type A (microsomal)</i>                                         | <b>CYB5A</b>    | 1528   | 4.1  |
| 67                          | <i>CD69 molecule</i>                                                             | <b>CD69</b>     | 969    | 4.1  |
| 68                          | <i>colony stimulating factor 3 (granulocyte)</i>                                 | <b>CSF3</b>     | 1440   | 3.9  |
| 69                          | <i>C-type lectin domain family 4, member E</i>                                   | <b>CLEC4E</b>   | 26253  | 3.8  |
| 70                          | <i>laminin, beta 3</i>                                                           | <b>LAMB3</b>    | 3914   | 3.8  |
| 71                          | <i>kynureninase (L-kynurenine hydrolase)</i>                                     | <b>KYNU</b>     | 8942   | 3.7  |
| 72                          | <i>RAD50 homolog (S. cerevisiae)</i>                                             | <b>RAD50</b>    | 10111  | 3.6  |
| 73                          | <i>cathepsin H</i>                                                               | <b>CTSH</b>     | 1512   | 3.5  |
| 74                          | <i>G protein-coupled receptor, family C, group 5, member B</i>                   | <b>GPRC5B</b>   | 51704  | 3.5  |
| 75                          | <i>inhibin, beta A (activin A, activin AB alpha polypeptide)</i>                 | <b>INHBA</b>    | 3624   | 3.5  |
| 76                          | <i>cathepsin S</i>                                                               | <b>CTSS</b>     | 1520   | 3.5  |
| 77                          | <i>colony stimulating factor 1 (macrophage)</i>                                  | <b>CSF1</b>     | 1435   | 3.5  |
| 78                          | <i>cathepsin K</i>                                                               | <b>CTSK</b>     | 1513   | 3.5  |
| 79                          | <i>chromosome 11 open reading frame 17</i>                                       | <b>C11orf17</b> | 56672  | 3.4  |
| 80                          | <i>purinergic receptor P2X, ligand-gated ion channel, 4</i>                      | <b>P2RX4</b>    | 5025   | 3.3  |
| 81                          | <i>indoleamine-pyrrole 2,3 dioxygenase</i>                                       | <b>INDO</b>     | 3620   | 3.3  |
| 82                          | <i>family with sequence similarity 129, member A</i>                             | <b>FAM129A</b>  | 116496 | 3.3  |
| 83                          | <i>interleukin 18 receptor 1</i>                                                 | <b>IL18R1</b>   | 8809   | 3.3  |
| 84                          | <i>phospholipase A2, group IVA (cytosolic, calcium-dependent)</i>                | <b>PLA2G4A</b>  | 5321   | 3.3  |
| 85                          | <i>Wilms tumor 1 associated protein</i>                                          | <b>WTAP</b>     | 9589   | 3.3  |
| 86                          | <i>glutamine-fructose-6-phosphate transaminase 2</i>                             | <b>GFPT2</b>    | 9945   | 3.2  |
| 87                          | <i>complement component 1, r subcomponent</i>                                    | <b>C1R</b>      | 715    | 3.2  |
| 88                          | <i>BCL2-related protein A1</i>                                                   | <b>BCL2A1</b>   | 597    | 3.2  |
| 89                          | <i>hyaluronan and proteoglycan link protein 3</i>                                | <b>HAPLN3</b>   | 145864 | 3.2  |
| 90                          | <i>TAP binding protein (tapasin)</i>                                             | <b>TAPBP</b>    | 6892   | 3.2  |
| 91                          | <i>interleukin-1 receptor-associated kinase 2</i>                                | <b>IRAK2</b>    | 3656   | 3.2  |
| 92                          | <i>complement factor B</i>                                                       | <b>CFB</b>      | 629    | 3.1  |
| 93                          | <i>lysosomal-associated membrane protein 3</i>                                   | <b>LAMP3</b>    | 27074  | 3.1  |
| 94                          | <i>C1q and tumor necrosis factor related protein 1</i>                           | <b>C1QTNF1</b>  | 114897 | 3.0  |
| 95                          | <i>solute carrier family 25, member 37</i>                                       | <b>SLC25A37</b> | 51312  | 3.0  |
| 96                          | <i>Prostaglandin-endoperoxide synthase 2</i>                                     | <b>PTGS2</b>    | 5743   | 3.0  |
| 97                          | <i>retinoic acid receptor responder (tazarotene induced) 1</i>                   | <b>RARRES1</b>  | 5918   | 3.0  |
| 98                          | <i>NK3 transcription factor related, locus 1 (Drosophila)</i>                    | <b>NKX3-1</b>   | 4824   | 2.9  |
| 99                          | <i>lymphocyte antigen 6 complex, locus E</i>                                     | <b>LY6E</b>     | 4061   | 2.9  |
| 100                         | <i>phospholipase A2, group IVC (cytosolic, calcium-independent)</i>              | <b>PLA2G4C</b>  | 8605   | 2.8  |
| 101                         | <i>lipopolysaccharide-induced TNF factor</i>                                     | <b>LITAF</b>    | 9516   | 2.7  |
| 102                         | <i>serpin peptidase inhibitor, clade B (ovalbumin), member 2</i>                 | <b>SERPINB2</b> | 5055   | 2.7  |
| 103                         | <i>TNF receptor-associated factor 1</i>                                          | <b>TRAF1</b>    | 7185   | 2.7  |
| 104                         | <i>butyrophilin, subfamily 3, member A3</i>                                      | <b>BTN3A3</b>   | 10384  | 2.7  |
| 105                         | <i>XIAP associated factor-1</i>                                                  | <b>BIRC4BP</b>  | 54739  | 2.7  |
| 106                         | <i>transmembrane protein induced by tumor necrosis factor alpha</i>              | <b>TMPIT</b>    | 83862  | 2.7  |
| 107                         | <i>complement component 1, s subcomponent</i>                                    | <b>C1S</b>      | 716    | 2.6  |
| 108                         | <i>toll-like receptor 3</i>                                                      | <b>TLR3</b>     | 7098   | 2.5  |
| 109                         | <i>zinc finger CCCH-type containing 12C</i>                                      | <b>ZC3H12C</b>  | 85463  | 2.5  |
| 110                         | <i>tumor necrosis factor receptor superfamily, member 9</i>                      | <b>TNFRSF9</b>  | 3604   | 2.5  |
| 111                         | <i>solute carrier family 15, member 3</i>                                        | <b>SLC15A3</b>  | 51296  | 2.5  |
| 112                         | <i>interleukin 15</i>                                                            | <b>IL15</b>     | 3600   | 2.4  |
| 113                         | <i>receptor-interacting serine-threonine kinase 2</i>                            | <b>RIPK2</b>    | 8767   | 2.4  |
| 114                         | <i>lectin, galactoside-binding, soluble, 3 binding protein</i>                   | <b>LGALS3BP</b> | 3959   | 2.4  |
| 115                         | <i>CD38 molecule</i>                                                             | <b>CD38</b>     | 952    | 2.3  |
| 116                         | <i>interleukin 1, alpha</i>                                                      | <b>IL1A</b>     | 3552   | 2.3  |
| 117                         | <i>lymphotoxin beta (TNF superfamily, member 3)</i>                              | <b>LTB</b>      | 4050   | 2.3  |
| 118                         | <i>C-type lectin domain family 1, member A</i>                                   | <b>CLEC1A</b>   | 51267  | 2.2  |
| 119                         | <i>likely ortholog of mouse D11lgp2</i>                                          | <b>LGP2</b>     | 79132  | 2.2  |
| 120                         | <i>ADP-ribosyltransferase 4 (Dombrock blood group)</i>                           | <b>ART4</b>     | 420    | 2.2  |
| 121                         | <i>coagulation factor II (thrombin) receptor-like 1</i>                          | <b>F2RL1</b>    | 2150   | 2.2  |
| 122                         | <i>guanylate binding protein 4</i>                                               | <b>GBP4</b>     | 115361 | 2.1  |
| 123                         | <i>sema domain, immunoglobulin domain (Ig), short basic domain, secreted, 3C</i> | <b>SEMA3C</b>   | 10512  | 2.0  |
| <b>Down-regulated genes</b> |                                                                                  |                 |        |      |
| 124                         | <i>extracellular link domain containing 1</i>                                    | <b>XLKD1</b>    | 10894  | 11.1 |
| 125                         | <i>chemokine (C-C motif) ligand 14</i>                                           | <b>CCL14</b>    | 6358   | 11.0 |
| 126                         | <i>ADAM metallopeptidase with thrombospondin type 1 motif, 18</i>                | <b>ADAMTS18</b> | 170692 | 7.8  |
| 127                         | <i>LIM domain binding 2</i>                                                      | <b>LDB2</b>     | 9079   | 6.7  |
| 128                         | <i>keratin 18</i>                                                                | <b>KRT18</b>    | 3875   | 5.3  |
| 129                         | <i>dual specificity phosphatase 4</i>                                            | <b>DUSP4</b>    | 1846   | 5.3  |
| 130                         | <i>ribonuclease, RNase A family, 1 (pancreatic)</i>                              | <b>RNASE1</b>   | 6035   | 4.7  |

|     |                                                                           |                  |        |     |
|-----|---------------------------------------------------------------------------|------------------|--------|-----|
| 131 | <i>periostin, osteoblast specific factor</i>                              | <b>POSTN</b>     | 10631  | 4.7 |
| 132 | <i>insulin-like growth factor binding protein 5</i>                       | <b>IGFBP5</b>    | 3488   | 4.6 |
| 133 | <i>regulator of G-protein signalling 5</i>                                | <b>RGS5</b>      | 8490   | 4.6 |
| 134 | <i>uropodin 1B (regulator of G-protein signalling 5)</i>                  | <b>UPK1B</b>     | 7348   | 4.5 |
| 135 | <i>regulator of G-protein signalling 4</i>                                | <b>RGS4</b>      | 5999   | 4.4 |
| 136 | <i>keratin 7</i>                                                          | <b>KRT7</b>      | 3855   | 4.2 |
| 137 | <i>apelin, AGTRL1 ligand</i>                                              | <b>APLN</b>      | 8862   | 4.0 |
| 138 | <i>furry homolog (Drosophila)</i>                                         | <b>FRY</b>       | 10129  | 3.9 |
| 139 | <i>prickle homolog 1 (Drosophila)</i>                                     | <b>PRICKLE1</b>  | 144165 | 3.8 |
| 140 | <i>palmelphin</i>                                                         | <b>PALMD</b>     | 54873  | 3.8 |
| 141 | <i>netrin 4</i>                                                           | <b>NTN4</b>      | 59277  | 3.7 |
| 142 | <i>endomucin</i>                                                          | <b>EMCN</b>      | 51705  | 3.5 |
| 143 | <i>BMX non-receptor tyrosine kinase</i>                                   | <b>BMX</b>       | 660    | 3.4 |
| 144 | <i>LIM homeobox 6</i>                                                     | <b>LHX6</b>      | 26468  | 3.3 |
| 145 | <i>response gene to complement 32</i>                                     | <b>RGC32</b>     | 28984  | 3.3 |
| 146 | <i>latent transforming growth factor beta binding protein 2</i>           | <b>LTBP2</b>     | 4053   | 3.2 |
| 147 | <i>C-X-C chemokine receptor type 4</i>                                    | <b>CXCR4</b>     | 7852   | 3.1 |
| 148 | <i>hypothetical protein</i>                                               | <b>DKFZP686</b>  | 22998  | 2.9 |
| 149 | <i>aldehyde dehydrogenase 1 family, member A1</i>                         | <b>ALDH1A1</b>   | 216    | 2.9 |
| 150 | <i>thioredoxin reductase 2</i>                                            | <b>TXNRD2</b>    | 10587  | 2.8 |
| 151 | <i>G protein-coupled receptor 116</i>                                     | <b>GPR116</b>    | 221395 | 2.8 |
| 152 | <i>carboxymethylenebutenolidase homolog (Pseudomonas)</i>                 | <b>CMBL</b>      | 134147 | 2.7 |
| 153 | <i>importin 11</i>                                                        | <b>IPO11</b>     | 51194  | 2.7 |
| 154 | <i>contactin associated protein-like 3</i>                                | <b>CNTNAP3</b>   | 389734 | 2.6 |
| 155 | <i>coxsackie virus and adenovirus receptor</i>                            | <b>CXADR</b>     | 1525   | 2.6 |
| 156 | <i>anthrax toxin receptor 1</i>                                           | <b>ANTXR1</b>    | 84168  | 2.6 |
| 157 | <i>integrin, alpha 10</i>                                                 | <b>ITGA10</b>    | 8515   | 2.5 |
| 158 | <i>dysferlin, limb girdle muscular dystrophy 2B (autosomal recessive)</i> | <b>DYSF</b>      | 8291   | 2.5 |
| 159 | <i>chromosome 10 open reading frame 116</i>                               | <b>C10orf116</b> | 10974  | 2.5 |
| 160 | <i>neuronal growth regulator 1</i>                                        | <b>NEGR1</b>     | 257194 | 2.4 |
| 161 | <i>T cell receptor beta variable 21-1</i>                                 | <b>TRBV21-1</b>  | 28566  | 2.4 |
| 162 | <i>homeodomain-only protein</i>                                           | <b>HOP</b>       | 84525  | 2.4 |
| 163 | <i>CD59 molecule, complement regulatory protein</i>                       | <b>CD59</b>      | 966    | 2.4 |
| 164 | <i>sema domain, transmembrane domain (TM), and cytoplasmic domain, 6A</i> | <b>SEMA6A</b>    | 57556  | 2.3 |
| 165 | <i>integrin, beta 4</i>                                                   | <b>ITGB4</b>     | 3691   | 2.3 |
| 166 | <i>glutathione peroxidase 3 (plasma)</i>                                  | <b>GPX3</b>      | 2878   | 2.3 |
| 167 | <i>mal, T-cell differentiation protein-like</i>                           | <b>MALL</b>      | 7851   | 2.2 |
| 168 | <i>cytochrome P450, family 1, subfamily A, polypeptide 1</i>              | <b>CYP1A1</b>    | 1543   | 2.2 |
| 169 | <i>thrombomodulin</i>                                                     | <b>THBD</b>      | 7056   | 2.2 |
| 170 | <i>interleukin 33</i>                                                     | <b>IL33</b>      | 90865  | 2.2 |
| 171 | <i>DIRAS family, GTP-binding RAS-like 3</i>                               | <b>DIRAS3</b>    | 9077   | 2.1 |
| 172 | <i>protein phosphatase 1, regulatory (inhibitor) subunit 16B</i>          | <b>PPP1R16B</b>  | 26051  | 2.1 |
| 173 | <i>chromosome 20 open reading frame 160</i>                               | <b>C20orf160</b> | 140706 | 2.0 |
| 174 | <i>pyruvate dehydrogenase kinase, isozyme 4</i>                           | <b>PKD4</b>      | 5166   | 2.0 |
