# Supplementary material for: Integrated microarray and multiplex cytokine analyses of Kaposi's Sarcoma Associated Herpesvirus viral FLICE Inhibitory Protein K13 affected genes and cytokines in human blood vascular endothelial cells
Source: PubMed Central journal article supplement (PMC2732924; doi:10.1186/1755-8794-2-50), 2009-08-06

**a.**

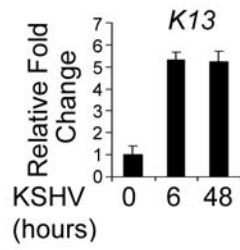

**b.**

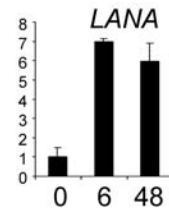

**c.**

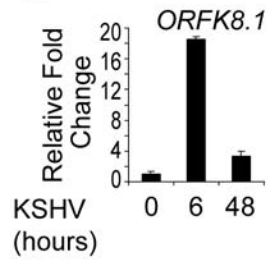

**d.**

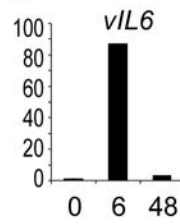

Supplement: 1755-8794-2-50-S5.pdf [file 1755-8794-2-50-S5.pdf]
